# Supplementary material for: The Integrity of α-β-α Sandwich Conformation Is Essential for a Novel Adjuvant TFPR1 to Maintain Its Adjuvanticity
Source: MDPI journal article supplement (doi:10.3390/biom9120869), 2019-12-12
Supplement: s1 [file s1]

## Supplementary Materials

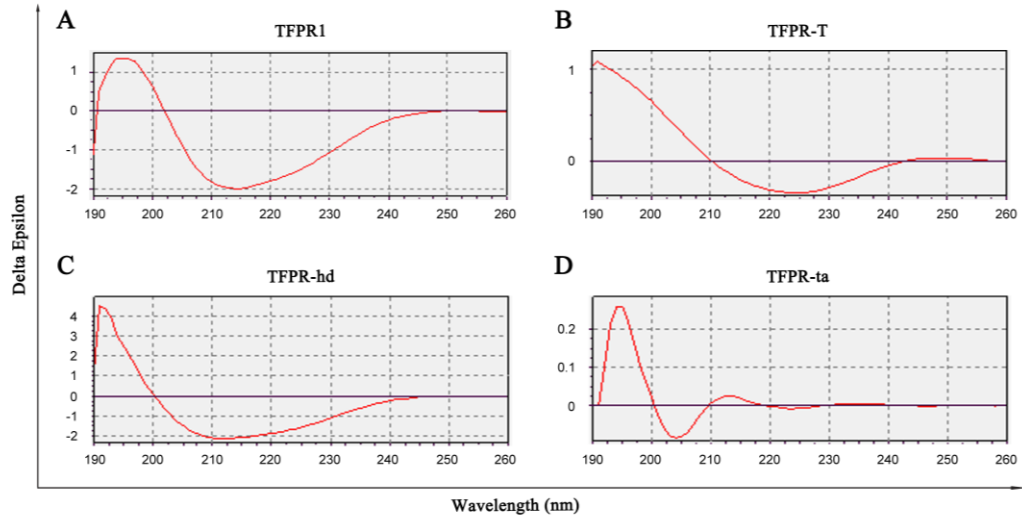

**Figure S1.** CD-spectrum of the four proteins TFPR1, TFPR-T, TFPR-hd and TFPR-ta. Concentration of each protein was adjusted to 0.4  $\mu\text{g}/\mu\text{L}$  using PBS; 200  $\mu\text{L}$  of protein solution was added to the cuvette, and absorption spectrum at wavelength of 190-260 nm was measured using Circular Dichroism (CD) spectrometer (Chirascan, Applied Photophysics Ltd, England), PBS was used as background; finally, each secondary structure content including  $\alpha$ -helix, anti-parallel and parallel  $\beta$ -sheet,  $\beta$  turn and random coil were analyzed using CDNN software (Gerald Böhm, Magdeburg). (A) TFPR1, (B) TFPR-T, (C) TFPR-hd and (D) TFPR-ta. The results shown in these figures have deducted the background of PBS (Fig. S2), in which each protein was dissolved.

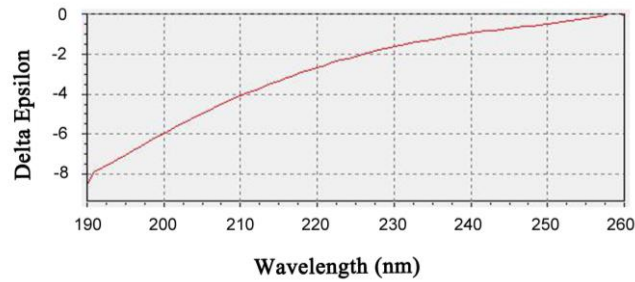

**Figure S2.** Spectrum analysis of PBS as background control by CD Spectrometer. PBS was used as background control of the CD-spectrum analysis of the four proteins, 200  $\mu\text{L}$  of PBS was added to the cuvette, and absorption spectrum at wavelength of 190-260 nm was measured using Circular Dichroism (CD) spectrometer (Chirascan, Applied Photophysics Ltd, England).
